Anesthesiology  
61:111, 1984

## A Method to Facilitate Fiberoptic Laryngoscopy

*To the Editor:*—Fiberoptic laryngoscopy has become an accepted method of intubating patients with difficult airway anatomy.<sup>1</sup> Teaching this technique may be a problem because short-acting hypnotics either do not allow sufficient time for the inexperienced endoscopist to perform the intubation or long-acting sedatives often leave the patient over-sedated at the termination of surgery. Rogers and Benumof describe two techniques to aid in fiberoptic endoscopy.<sup>2</sup> We describe a different method to facilitate intubation by use of the fiberoptic laryngoscope.

An antisialogogue is included in the preoperative medication. Both nostrils are anesthetized with 4% cocaine solution. Induction is accomplished with a small amount of sodium thiopental (1.0–1.5 mg/kg) and a volatile anesthetic in oxygen via mask maintaining spontaneous respirations. A well-lubricated naso-pharyngeal airway then is inserted. An appropriately sized connector from an endotracheal tube is placed into the naso-pharyngeal airway and connected to the breathing circuit of the anesthesia machine. After a sufficient depth of anesthesia is attained, the endotracheal tube with the fiberoptic laryngoscope in place is passed through the other nostril. With the mouth closed, spontaneous respirations continue through the naso-pharyngeal airway because the endotracheal tube is occluded by the fiberoptic laryngoscope. The vocal cords are visualized and the trachea is intubated in the usual manner.

This method has several advantages: 1) a great deal of time is available for the inexperienced laryngoscopist; 2) there is adequate time for more than one person to

view the anatomy; 3) the intubation is performed without excessive sedation, allowing for a quicker recovery, especially in outpatients; 4) waste gases effectively are scavenged; 5) spontaneous respirations are maintained and easily monitored by a precordial stethoscope and observing the reservoir bag.

This technique has proven valuable in short procedures. We successfully have used this method on a number of patients, including a closed reduction of a mandibular fracture on an outpatient, with a rapid recovery time. With this method it is possible to maintain a sufficient level of anesthesia to allow the inexperienced endoscopist time to view the anatomy and perform the intubation.

MARK A. WANGLER, M.D.  
*Resident in Anesthesiology*

JOEL M. WEAVER, D.D.S., PH.D.  
*Associate Professor in Anesthesiology*  
*Associate Professor in Oral Surgery*

*Ohio State University*  
*410 W. Tenth Avenue*  
*Columbus, Ohio 43210*

### REFERENCES

1. Patil V, Stehling L, Zauder H: Fiberoptic Endoscopy in Anesthesia. Chicago, Year Book Medical Publishers, 1983
2. Rogers SN, Benumof JL: New and easy techniques for fiberoptic endoscopy-aided tracheal intubation. *ANESTHESIOLOGY* 59:569–572, 1983

(Accepted for publication February 10, 1984.)

Anesthesiology  
61:111–112, 1984

## Cause and Prevention of Maternal Aspiration

*To the Editor:*—In 1981 we surveyed all members (approximately 600) of the Society for Obstetric Anesthesia and Perinatology to ascertain the incidence of and circumstances surrounding aspiration during obstetric anesthesia. One hundred twenty-three responded positively, *i.e.*, that for 1 year, they would report all cases of aspiration and the circumstances surrounding those cases. At the end of the 1-year period, 79 of the 123 reported 21 cases of aspiration.

Because data were incomplete in many responses, the incidence of aspiration could not be estimated. Although the major intent of the survey was not fulfilled, some of

the information is worth reporting, *viz.*, that regarding circumstances surrounding aspiration and the association with failed or difficult endotracheal intubation. The latest maternal mortality studies from England and Wales indicate that these two complications represent the major causes of maternal mortality secondary to anesthesia and that anesthesia was the primary cause of death during cesarean section<sup>1,2</sup>; the same is probably true in the United States.<sup>3</sup> However, because the United States has no national maternal mortality survey, such data are difficult to find. Therefore, we provide the following.

Among the 21 reported cases of aspiration, there were
